# Supplementary material for: Valuation of Ecosystem Services for the Sustainable Development of Hani Terraces: A Rice–Fish–Duck Integrated Farming Model
Source: MDPI journal article supplement (doi:10.3390/ijerph19148549), 2022-07-13
Supplement: s1 [file s1]

### **Questions for farmer**

Name of village:

Phone number:

1. Name, gender, age, education, number of family.
2. Number and size of land owned. How many are in actual operation?
3. Integrated rice-fish-duck farming areas? Hybrid rice culture areas? Red rice culture areas? Fish farming areas?
4. Who is doing day-to-day operations on the land? How many years are engaged in the farming?
5. What are the main activities on the farm?
6. Some monitoring data

|                                                                       |  |
|-----------------------------------------------------------------------|--|
| The height of the ridge                                               |  |
| daily water depth in the terraces                                     |  |
| number of the growth periods of rice                                  |  |
| number of the growth periods fish                                     |  |
| number of the growth periods duck                                     |  |
| the number of days of standing water during the growth period of rice |  |
| the number of hot days in summer                                      |  |
| market price of agricultural water                                    |  |

#### 7. The input and harvest of rice-fish-duck farming in 2020

|                |                   | Volume/Yield | Price |
|----------------|-------------------|--------------|-------|
| <b>Input</b>   | Land rent         |              |       |
|                | Seed of rice      |              |       |
|                | Seed of fish fry  |              |       |
|                | Seed of ducking   |              |       |
|                | Fertilizer        |              |       |
|                | Pesticide         |              |       |
|                | Labor             |              |       |
| <b>Harvest</b> | Rice              |              |       |
|                | fish              |              |       |
|                | duck and duck egg |              |       |

8. Is additional labour hired in peak season or for harvest? If yes, what are the costs?
9. Where and how was the product sold? Bought by whom? (trader, individual consumer, processing company etc.)

10. What are main problems / challenges experienced in farm? (techniques, accessibility of inputs, markets and price for harvested products, support, credit, feed, seed, etc.).
11. Integrated rice-fish-duck farming has various ecosystem services such as climate regulation, water conservation, and biodiversity maintenance. Do you know this?
12. In your opinion, what other aspects of the integrated rice-fish-duck farming ecosystem of Hani terraces need to be improved?
13. Any other comments you would like to give? (any other remark in relation to the project).

Thank you for your time!
